# Supplementary material for: Interplay between the RNA Chaperone Hfq, Small RNAs and Transcriptional Regulator OmpR Modulates Iron Homeostasis in the Enteropathogen Yersinia enterocolitica
Source: MDPI journal article supplement (doi:10.3390/ijms241311157), 2023-07-06
Supplement: s1 [file s1]

**Table S1.** Strains and plasmids used in this study

| Strains and plasmids                          | Description                                                                                                                                                                                                    | Reference or source                     |
|-----------------------------------------------|----------------------------------------------------------------------------------------------------------------------------------------------------------------------------------------------------------------|-----------------------------------------|
| <b><i>Y. enterocolitica</i> 2/O:9 strains</b> |                                                                                                                                                                                                                |                                         |
| Ye9                                           | Clinical isolate of serotype O:9, carrying virulence plasmid pYV                                                                                                                                               | Clinical isolate, laboratory collection |
| Ye9N                                          | Ye9 derivative, spontaneous Nal <sup>R</sup> mutant                                                                                                                                                            | [1]                                     |
| AR4                                           | Ye9N derivative $\Delta ompR::Km$ defective in OmpR production, Nal <sup>R</sup> , Km <sup>R</sup>                                                                                                             | [2]                                     |
| Ye9 $hfq$                                     | Ye9N derivative $\Delta hfq::Gm$ defective in Hfq production, Nal <sup>R</sup> , Gm <sup>R</sup>                                                                                                               | This study                              |
| Ye9 $omrA$                                    | Ye9N derivative $\Delta omrA::Gm$ defective in OmrA synthesis, Nal <sup>R</sup> , Gm <sup>R</sup>                                                                                                              | This study                              |
| Ye9Fflag                                      | Ye9N, $fur::3\times flag$ , Nal <sup>R</sup>                                                                                                                                                                   | [3]                                     |
| Ye9FecAflag                                   | Ye9N, $fecA::3\times flag$ , Nal <sup>R</sup>                                                                                                                                                                  | This study                              |
| Ye9FepAflag                                   | Ye9N, $fepA::3\times flag$ , Nal <sup>R</sup>                                                                                                                                                                  | This study                              |
| <b><i>E. coli</i> strains</b>                 |                                                                                                                                                                                                                |                                         |
| DH5 $\alpha$                                  | F', $endA1$ , $hsdR17(r_k m^+_k)$ , $supE44$ , $thi-1$ , $recA1$ , $\Delta(lacIZYA-argF)$ U169 $deoR$ [ $\phi 80dlac\Delta(lacZ)M15$ ]                                                                         | [4]                                     |
| TOP 10F'                                      | F' $\{lacI^qTn10(Tet^R)\}$ $mcrA \Delta(mrr-hsdRMS-mcrBC)$ $\phi 80lacZ\Delta M15 \Delta lacX74 recA1 araD139 \Delta(ara-leu)7697 galU galK rpsL endA1 nupG$                                                   | Thermo Fisher Scientific                |
| S17-1 $\lambda pir$                           | Tp <sup>R</sup> , Str <sup>R</sup> , $pro$ , $thi$ , $recA$ , $hsdR514$ , (r m <sup>+</sup> ), $\lambda pir$ , RP4: 2- Tc::Mu-Km <sup>R</sup> ::Tn7                                                            | [5]                                     |
| CC118 $\lambda pir$                           | $\Delta(ara-leu) araD \Delta lacX174 galE galK phoA thiE1 rpsE rpoB(Rif^R) argE(Am) recA1$ , $\lambda pir$ lysogen                                                                                             | [6]                                     |
| BL21 (DE3)                                    | F <sup>-</sup> , $ompT$ $hsdSB$ (r <sub>B</sub> -m <sub>B</sub> -) $gal$ , $dcm$ (DE3)                                                                                                                         | Life Technologies                       |
| <b>Plasmids</b>                               |                                                                                                                                                                                                                |                                         |
| pFX-P                                         | Golden Gate-compatible pDSK602 derivative without promoter for generation of translational mRNA:: <i>gfp</i> fusions, Sp <sup>R</sup>                                                                          | [7]                                     |
| pFX- <i>fur</i>                               | pFX-P derivative carrying untranslated region of <i>fur</i> (5'UTR) with the first 8 codons of ORF <i>fur</i> , fused in frame with <i>gfp</i> , Sp <sup>R</sup>                                               | O. Rossier laboratory                   |
| pFX- <i>fecA</i>                              | pFX-P derivative carrying untranslated region of <i>fecA</i> (5'UTR) with the first 18 codons of ORF <i>fecA</i> , fused in frame with <i>gfp</i> , Sp <sup>R</sup>                                            | This study                              |
| pFX- <i>fepA</i>                              | pFX-P derivative carrying untranslated region of <i>fepA</i> (5'UTR) with the first 13 codons of ORF <i>fepA</i> fused in frame with <i>gfp</i> , Sp <sup>R</sup>                                              | This study                              |
| pFX- <i>ompR</i>                              | pFX-P derivative carrying untranslated region of <i>ompR</i> (5'UTR) with the first 4 codons of ORF <i>ompR</i> fused in frame with <i>gfp</i> , Sp <sup>R</sup>                                               | [8]                                     |
| pBR-plac (pBR1)                               | pBR322 with SspI/AatII artificial P <sub>LlacO-1</sub> promoter modified by the introduction of an AatII restriction site between position -6 and -1 relative to the transcription start site, Tc <sup>R</sup> | [9]                                     |

|                                                                                                                                                                                                                                                                                                                                                                                                     |                                                                                                                                                                                                        |                       |
|-----------------------------------------------------------------------------------------------------------------------------------------------------------------------------------------------------------------------------------------------------------------------------------------------------------------------------------------------------------------------------------------------------|--------------------------------------------------------------------------------------------------------------------------------------------------------------------------------------------------------|-----------------------|
| pBR-RyhB1                                                                                                                                                                                                                                                                                                                                                                                           | pBR1 with AatII/EcoRI <i>ryhB1</i> sequence, Tc <sup>R</sup>                                                                                                                                           | This study            |
| pBR-OmrA                                                                                                                                                                                                                                                                                                                                                                                            | pBR1 with AatII/EcoRI <i>omrA</i> sequence, Tc <sup>R</sup>                                                                                                                                            | This study            |
| pHR4                                                                                                                                                                                                                                                                                                                                                                                                | pHSG575 with 740 bp fragment containing entire coding sequence of <i>ompR</i> (ORF with rbs), Cm <sup>R</sup>                                                                                          | [2]                   |
| pRK2013                                                                                                                                                                                                                                                                                                                                                                                             | Helper plasmid, Km <sup>R</sup>                                                                                                                                                                        | [10]                  |
| pDS132                                                                                                                                                                                                                                                                                                                                                                                              | <i>ori</i> R6K (narrow host range, replication only in <i>E. coli</i> $\lambda$ pir), <i>oriT</i> RK2, <i>sacB</i> , Cm <sup>R</sup>                                                                   | [11]                  |
| pDSomrA                                                                                                                                                                                                                                                                                                                                                                                             | pDS132 derivative carrying 2135 bp cassette for <i>omrA</i> mutagenesis constructed by overlap extension PCR cloned between XbaI sites of the vector, Gm <sup>R</sup>                                  | This study            |
| pDShfq                                                                                                                                                                                                                                                                                                                                                                                              | pDS132 derivative carrying 1756 bp cassette for <i>hfq</i> mutagenesis constructed by overlap extension PCR cloned between XbaI sites of the vector, Tp <sup>R</sup>                                   | This study            |
| pPROBE TT'                                                                                                                                                                                                                                                                                                                                                                                          | Broad-host-range cloning vector pBBR1MCS-3 with promoterless <i>gfp</i> , Tc <sup>R</sup>                                                                                                              | [12]                  |
| pPomrA                                                                                                                                                                                                                                                                                                                                                                                              | derivative of pPROBE TT' with subcloned 149 bp EcoRI/KpnI fragment of <i>omrA</i> promoter region, Tc <sup>R</sup>                                                                                     | This study            |
| pDSfur-FLAG                                                                                                                                                                                                                                                                                                                                                                                         | pDS132 carrying 132 bp upstream of <i>fur</i> start codon and 444 bp of <i>fur</i> ORF (without stop codon) fused in frame with 69 bp of 3×FLAG epitope and 663 bp downstream of <i>fur</i> stop codon | This study            |
| pDSfecA-FLAG                                                                                                                                                                                                                                                                                                                                                                                        | pDS132 carrying 529 bp fragment of <i>fecA</i> gene without a STOP codon fused in frame with 69 bp of 3×FLAG epitope and 175 bp downstream of <i>fecA</i> stop codon                                   | This study            |
| pDSfepA-FLAG                                                                                                                                                                                                                                                                                                                                                                                        | pDS132 carrying 605 bp fragment of <i>fepA</i> gene without a STOP codon fused in frame with 69 bp of 3×FLAG epitope and 582 bp downstream of <i>fepA</i> stop codon                                   | This study            |
| pBAD24Cm                                                                                                                                                                                                                                                                                                                                                                                            | pBAD24 with CAT (Cm <sup>r</sup> ) replacing <i>bla</i> , <i>ori</i> pBR322, MCS-3, <i>araC</i>                                                                                                        | [13]                  |
| pBAD-Hfq                                                                                                                                                                                                                                                                                                                                                                                            | pBAD24 with 306-bp fragment of <i>hfq</i> gene                                                                                                                                                         | O. Rossier laboratory |
| Cm <sup>R</sup> chloramphenicol resistance, Gm <sup>R</sup> gentamicin resistance, Km <sup>R</sup> kanamycin resistance, Nal <sup>R</sup> nalidixic acid resistance, Sm <sup>R</sup> streptomycin resistance, Tc <sup>R</sup> tetracycline resistance, Tp <sup>R</sup> trimethoprim resistance, ::Km, insertion of kanamycin resistance cassette; ::Gm, insertion of gentamicin resistance cassette |                                                                                                                                                                                                        |                       |

**Table S2.** Oligonucleotide primers used in this study

| Purpose and Target                                                                      | Name of primer | Primer sequence (5' → 3')                                                                                                   | Restriction sites | Reference  |
|-----------------------------------------------------------------------------------------|----------------|-----------------------------------------------------------------------------------------------------------------------------|-------------------|------------|
| Construction of $\Delta omrA$ mutant                                                    | dOmrA(A)_F     | GCTCTAGACAGCGGCATCTGTCTTATTC                                                                                                | XbaI              | This study |
|                                                                                         | dOmrA(A)_R     | CATCCGTTTCCACGCACTACTCTATCCG                                                                                                |                   |            |
|                                                                                         | dOmrA(B)_F     | CGGATAGAGTAGTGCGTGGAACGGATG                                                                                                 |                   |            |
|                                                                                         | dOmrA(B)_R     | GCGGAGAGAAACAAACGATCTCGGCTTGA                                                                                               |                   |            |
|                                                                                         | dOmrA(C)_F     | TCAAGCCGAGATCGTTTGTTCTCTCCGC                                                                                                |                   |            |
|                                                                                         | dOmrA(C)_R     | CGTCTAGAATGGCGTGTAAGCGCTCACC                                                                                                | XbaI              |            |
|                                                                                         | dOmrA(D)_F     | TGGGTGCCGTTGACGGATTG                                                                                                        |                   |            |
|                                                                                         | dOmrA(D)_R     | GGCCAGGGTCAGACTTTCTC                                                                                                        |                   |            |
| Construction of $\Delta hfq$ mutant                                                     | dHfq(A)_F      | CGTCTAGAGGTAAACTCTAACAGAACTGAC                                                                                              | XbaI              | This study |
|                                                                                         | dHfq(A)_R      | TGTCAACTGGGTTCGTGAATTCTCTATATTTTCCTTATTTGCTTGTTGT                                                                           |                   |            |
|                                                                                         | dHfq(B)_F      | CAAGCAAATAAGGAAAATATAGAGAATTACGAACCCAGTTGACA                                                                                |                   |            |
|                                                                                         | dHfq(B)_R      | TGACCAGCAATGCGCTGAATTCTTAGGCCACACGTTCAA                                                                                     |                   |            |
|                                                                                         | dHfq(C)_F      | TTGAACGTGTGGCCTAAGAATTCAGCGCATTGCTGGTCA                                                                                     |                   |            |
|                                                                                         | dHfq(C)_R      | CGTCTAGATACCAAACGAGTCGCAATAT                                                                                                | XbaI              |            |
|                                                                                         | dHfq(D)_F      | TAATGATCCCCAACGGCTCT                                                                                                        |                   |            |
|                                                                                         | dHfq(D)_R      | GTTTCACCTGGCCCTCTTAG                                                                                                        |                   |            |
| Construction of <i>fecA'</i> :: <i>gfp</i> translational fusion                         | FecAYe9_F      | TTTGGTCTCTATTCCCCCTTATTCCAAATGGTTTTTATTT                                                                                    | BsaI              | This study |
|                                                                                         | FecAYe9_R      | TTTGGTCTCTTAGCTAATGCCAGCGCGACGGA                                                                                            | BsaI              |            |
| Construction of <i>fepA'</i> :: <i>gfp</i> translational fusion                         | FepAYe9_fw     | TTTGGTCTCTATTTCGGCATAATGACTCCTTCACTGG                                                                                       | BsaI              | This study |
|                                                                                         | FepAYe9_rev    | TTTGGTCTCTTAGCTAAGGTCGTCTAGAGAGCGCC                                                                                         | BsaI              |            |
| Confirmation of <i>gfp</i> sequence                                                     | gfp_F          | AGTGGAGAGGGTGAAGGTGA                                                                                                        |                   | This study |
|                                                                                         | gfp_R          | AAAGGGCAGATTGTGTGGAC                                                                                                        |                   |            |
| Confirmation of the correct sequence of translational fusions                           | OR177pFX_fw    | CCATGCTCAGAAAAGGCTTAACA                                                                                                     |                   | [7]        |
|                                                                                         | OR178pFX_rev   | CCGTATGTAGCATCACCTTCA                                                                                                       |                   |            |
| Construction of $P_{omrA}$ :: <i>gfp</i> transcriptional fusion                         | omrAE_F        | TGGAATTCATCGGATGTACCGCAATGA                                                                                                 | EcoRI             | This study |
|                                                                                         | omrAK_R        | TGGGTACCGGGATCACTACTCTATCCGCTTA                                                                                             | KpnI              |            |
| Confirmation of the correct sequence of $P_{omrA}$ :: <i>gfp</i> transcriptional fusion | pBR_F          | ACCGCTGTTGAGATCCAGTT                                                                                                        |                   | This study |
|                                                                                         | pBR_omrA_R     | CGTAGGTCGGTGCAAATAAA                                                                                                        |                   |            |
| Construction of pBR-RyhB1 overexpression plasmid                                        | RyhB1-For      | GACGTCGCTTTTCAGATGAGACCATCAAAGTTTAGGTGTTACATTACGAA<br>GGCAGCAGATTGCTCACATTGCTTCCAGTGTTTACTTAGCCAGCCGGGTG<br>CTGGCTTTTGAATTC | AatII, EcoRI      | This study |

|                                                                     |                         |                                                                                                                         |              |            |
|---------------------------------------------------------------------|-------------------------|-------------------------------------------------------------------------------------------------------------------------|--------------|------------|
|                                                                     | RyhB1-Rev               | AATTCAAAGCCAGCACCCGGCTGGCTAAGTAAACACTGGAAGCAATGTG<br>AGCAATGTCGTGCCTTCGTAATGTGAACACCTAACTTTGATGGTCTCAT<br>CTGAAAGCGACGT | EcoRI, AatII |            |
| Construction of pBR-OmrA overexpression plasmid                     | OmrA-For                | GACGTCCCCAGAGGTATTAATTGGTGAGTAATCAACATACGCTGTGTGTT<br>AAAGCCAGTTTTTTTATTTGCACCGACCTACGCAGATGCGTAGGTTTTTTT<br>TGGAATTC   | AatII, EcoRI | This study |
|                                                                     | OmrA-Rev                | AATTCCAAAAAACCCTACGCATCTGCGTAGGTCGGTGCAAATAAAAAAC<br>TGGCTTTAACACACAGCGTATGTTGATTACTACCAATTAATACCTCTGG<br>GGACGT        | EcoRI, AatII |            |
| Confirmation of the correct sequence of pBR- overexpression vectors | pBR1-For                | TAGTGTATGCGGCGACCGAG                                                                                                    |              | This study |
|                                                                     | pBR1-Rev                | ACGGTGCCTGACTGCGTTAG                                                                                                    |              |            |
| Construction of strains carrying FecA-3×FLAG                        | 1FecFLAGXba-F           | GCTCTAGAACAAATCTGGGAGCGACAAC                                                                                            | XbaI         | This study |
|                                                                     | 2FecFLAG-R              | CCGTCATGGTCTTTGTAGTCGAAGGCAACTGACCCCTGC                                                                                 |              |            |
|                                                                     | 3FLAGFec-F              | GACTACAAAGACCATGACGGTGATTATAAAGATCATGATATCGATTACA-<br>AGGATGACGATGACAAGTAGATTAGCAGGTTAAGATAAGCC                         |              |            |
|                                                                     | 4FLAGFecXba-R           | GCTCTAGATCACTGGCTCATCTGTTGGT                                                                                            | XbaI         |            |
|                                                                     | FlagSpr1                | TCATCGTCATCCTTGTAATCG                                                                                                   |              |            |
|                                                                     | FlagSpr2                | CTACAAAGACCATGACGGTGA                                                                                                   |              |            |
|                                                                     | 5FecFLAG-F              | TGGGTCTGGAACCTGGATAG                                                                                                    |              |            |
|                                                                     | 6FecFLAG-R              | AATACCTAAGCCCGGCAAAT                                                                                                    |              |            |
| Construction of strains carrying FepA-3×FLAG                        | 1FepFLAGXba-F           | GCTCTAGACCGTAATAAGATTGAGCCAGGT                                                                                          | XbaI         | This study |
|                                                                     | 2FepFLAG-R              | CCGTCATGGTCTTTGTAGTCAAACCTGGGTATTCAAGCTAACAAAA                                                                          |              |            |
|                                                                     | 3FLAGFep-F              | GACTACAAAGACCATGACGGTGATTATAAAGATCATGATATCGATTACA-<br>AGGATGACGATGACAAGTAGCCGTTAGGAAAATCACCTAAAAATAG                    |              |            |
|                                                                     | 4FLAGFepXba-R           | GCTCTAGACACGACTCTCTCCTCGCTTT                                                                                            | XbaI         |            |
|                                                                     | FlagSpr1                | TCATCGTCATCCTTGTAATCG                                                                                                   |              |            |
|                                                                     | FlagSpr2                | CTACAAAGACCATGACGGTGA                                                                                                   |              |            |
|                                                                     | 5FepFLAG-F              | CCGGTGCAGCAACCTATAAT                                                                                                    |              |            |
|                                                                     | 6FepFLAG-R              | AACCTCCCCGCATAATAACC                                                                                                    |              |            |
| EMSA, 250 bp fragment of <i>omrA</i>                                | EomrAYe_F               | GAGTTATCGAGGTTTGTCTAGCA                                                                                                 |              | This study |
|                                                                     | EomrAYe_R               | TGGCTTTAACACACAGCGTA                                                                                                    |              |            |
| EMSA, 304 bp fragment of 16S rDNA used as a negative control        | E16S304Ye_F             | ATTCCGATTAAACGCTTGCAC                                                                                                   |              | [14]       |
|                                                                     | E16S304Ye_R             | GTGGGGTAATGGCTCACCTA                                                                                                    |              |            |
| RT-qPCR analysis of <i>Y. enterocolitica fur</i>                    | RT <sub>fur</sub> Ye9_F | CGGTATTGTTACCCGCCATAA                                                                                                   |              | [3]        |

|                                                                                          |                          |                                |  |            |
|------------------------------------------------------------------------------------------|--------------------------|--------------------------------|--|------------|
| expression                                                                               | RT <sub>fur</sub> Ye9_R  | TCACTTTGCCGCAATCCA             |  |            |
| RT-qPCR analysis of <i>Y. enterocolitica</i> <i>fecA</i> expression                      | RT <sub>fecA</sub> Ye9_F | CTTGACGGCTGAAAAAGCACA          |  | [3]        |
|                                                                                          | RT <sub>fecA</sub> Ye9_R | TGAATGCCAACTCCACACCT           |  |            |
| RT-qPCR analysis of <i>Y. enterocolitica</i> <i>fepA</i> expression                      | RT <sub>fepA</sub> Ye9_F | ATGCGGTGCGTTATGGTTG            |  | [3]        |
|                                                                                          | RT <sub>fepA</sub> Ye9_R | TGATATTCACCACGCCACCT           |  |            |
| RT-qPCR analysis of <i>Y. enterocolitica</i> gene expression – internal control 16s rRNA | RT16rRNAYe9-F            | CATCATGGCCCTTACGAGTAG          |  | [3]        |
|                                                                                          | RT16rRNAYe9-R            | CCGGACTACGACAGACTTTATG         |  |            |
| RyhB-1 probe for Northern blot                                                           | RyhB-1 NB                | TCGTAATGTGAACACCTAAACTTTGATGGT |  | This study |
| OmrA probe for Northern blot                                                             | OmrA NB                  | GTGCAAATAAAAACTGGCTTTAACACACA  |  | This study |

**Table S3.** sRNA OmrA- and OmrB-encoding genes in selected Gammaproteobacteria

| Species <sup>a</sup>            | sRNA gene | Strand <sup>b</sup> | Start <sup>c</sup> | End <sup>c</sup> | Adjacent genes <sup>d</sup>                                      | Orientation <sup>e</sup> |
|---------------------------------|-----------|---------------------|--------------------|------------------|------------------------------------------------------------------|--------------------------|
| <i>E.col.</i>                   | omrA      | -                   | 2976189            | 2976102          | <i>aas/omrB</i>                                                  | <<<                      |
| <i>S.fle.</i>                   |           | -                   | 2936548            | 2936461          | <i>aas/omrB</i>                                                  | <<<                      |
| <i>S.ent.</i>                   |           | -                   | 3190017            | 3189931          | <i>aas/omrB</i>                                                  | <<<                      |
| <i>K.pne.</i>                   |           | -                   | 4346498            | 4346411          | <i>aas/omrB</i>                                                  | <<<                      |
| <i>Y.ent.</i> Ye9N <sup>f</sup> |           | NA                  | NA                 | NA               | <i>ISYen1 family transposase/aas</i>                             | NA                       |
| <i>Y.ent.</i> 8081              |           | -                   | 3638400            | 3638306          | <i>aas/ISYen1 family transposase</i>                             | <<                       |
| <i>Y.int.</i>                   |           | +                   | 828423             | 828517           | <i>bisC/aas</i>                                                  | >>>                      |
| <i>Y.ruc.</i>                   |           | -                   | 2931527            | 2931435          | <i>aas/hp</i>                                                    | <<                       |
| <i>Y.pse.</i>                   |           | +                   | 4047527            | 4047621          | <i>bisC/aas</i>                                                  | >>>                      |
| <i>Y.pes.</i>                   |           | +                   | 233753             | 233847           | <i>bisC/aas</i>                                                  | >>>                      |
| <i>S.mar.</i>                   |           | +                   | 578519             | 578611           | <i>bisC/aas</i>                                                  | >>>                      |
| <i>E.car.</i>                   |           | -                   | 4090604            | 4090514          | <i>aas/gene encoding<br/>methyl-accepting chemotaxis protein</i> | <<                       |
| <i>D.dad.</i>                   |           | -                   | 3953607            | 3953517          | <i>bglG/lpxO</i>                                                 | <<<                      |
| <i>E.col.</i>                   | omrB      | -                   | 2976385            | 2976304          | <i>omrA/galR</i>                                                 | <<                       |
| <i>S.fle.</i>                   |           | -                   | 2936745            | 2936664          | <i>omrA/galR</i>                                                 | <<                       |
| <i>K.pne.</i>                   |           | -                   | 4346696            | 4346615          | <i>omrA/galR</i>                                                 | <<                       |
| <i>S.ent.</i>                   |           | -                   | 3190217            | 3190133          | <i>omrA/galR</i>                                                 | <<                       |

<sup>a</sup>Selected species: *Escherichia coli* str. K-12 substr. MG1655 (*E.col.*; NCBI:taxid511145); *Shigella flexneri* serotype 2a str. 301 (*S.fle.*; NCBI:taxid198214); *Salmonella enterica* subsp. *enterica* serovar Typhimurium str. 14028S (*S.ent.*; NCBI:taxid588858); *Klebsiella pneumoniae* subsp. *pneumoniae* HS11286 (*K.pne.*; NCBI:taxid1125630); *Yersinia enterocolitica* subsp. *paleartica* Ye9N bioserotype 2/O:9 (*Y.ent* Ye9N; a shotgun genome sequence: Accession number JAALCX010000053.1); *Yersinia enterocolitica* subsp. *enterocolitica* 8081 bioserotype 1B/O:8 (*Y.ent.* 8081; NCBI:taxid:393305); *Yersinia intermedia* (*Y.int.*; NCBI:taxid631); *Yersinia ruckeri* ATCC 29473 (*Y.ruc.*; NCBI:taxid527005); *Yersinia pseudotuberculosis* IP 32953 (*Y.pse.*; NCBI:taxid273123); *Yersinia pestis* str. A1122 (*Y.pes.*; NCBI:taxid1035377); *Serratia marcescens* strain KS10 (*S.mar.*; NCBI:taxid615); *Erwinia carotovora* subsp. *atroseptica* SCRI1043 (*E.car.*; NCBI:taxid218491); *Dickeya dadantii* 3937 (*D.dad.*; NCBI:taxid198628).

<sup>b</sup>The strand (+: forward strand; -: reverse strand) of the chromosome on which the sRNA is encoded.

<sup>c</sup>The specific location of the gene within the chromosome.

<sup>d</sup>The flanking regions upstream/downstream of the sRNA gene

<sup>e</sup>The orientation of the sRNA gene and of the adjacent left and right flanking genes

<sup>f</sup>NA - not assigned, *ISYen1* family transposase/*omrA/aas* are localized in contig 53 (Accession number NZ\_JAALCX010000053.1) of the *Yersinia enterocolitica* subsp. *paleartica* Ye9N bioserotype 2/O:9 genome

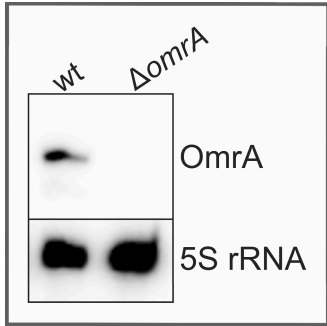

**Figure S1.** The abundance of *omrA* transcripts assessed by Northern blotting. The level of the *omrA* mRNA in the wild-type strain Ye9N and  $\Delta omrA$  mutant (Ye9*omrA*) grown in LB medium were analyzed. As a loading control, the level of 5S rRNA was examined. The RNA molecules were detected by hybridization with <sup>32</sup>P-labeled DNA oligonucleotide probes.

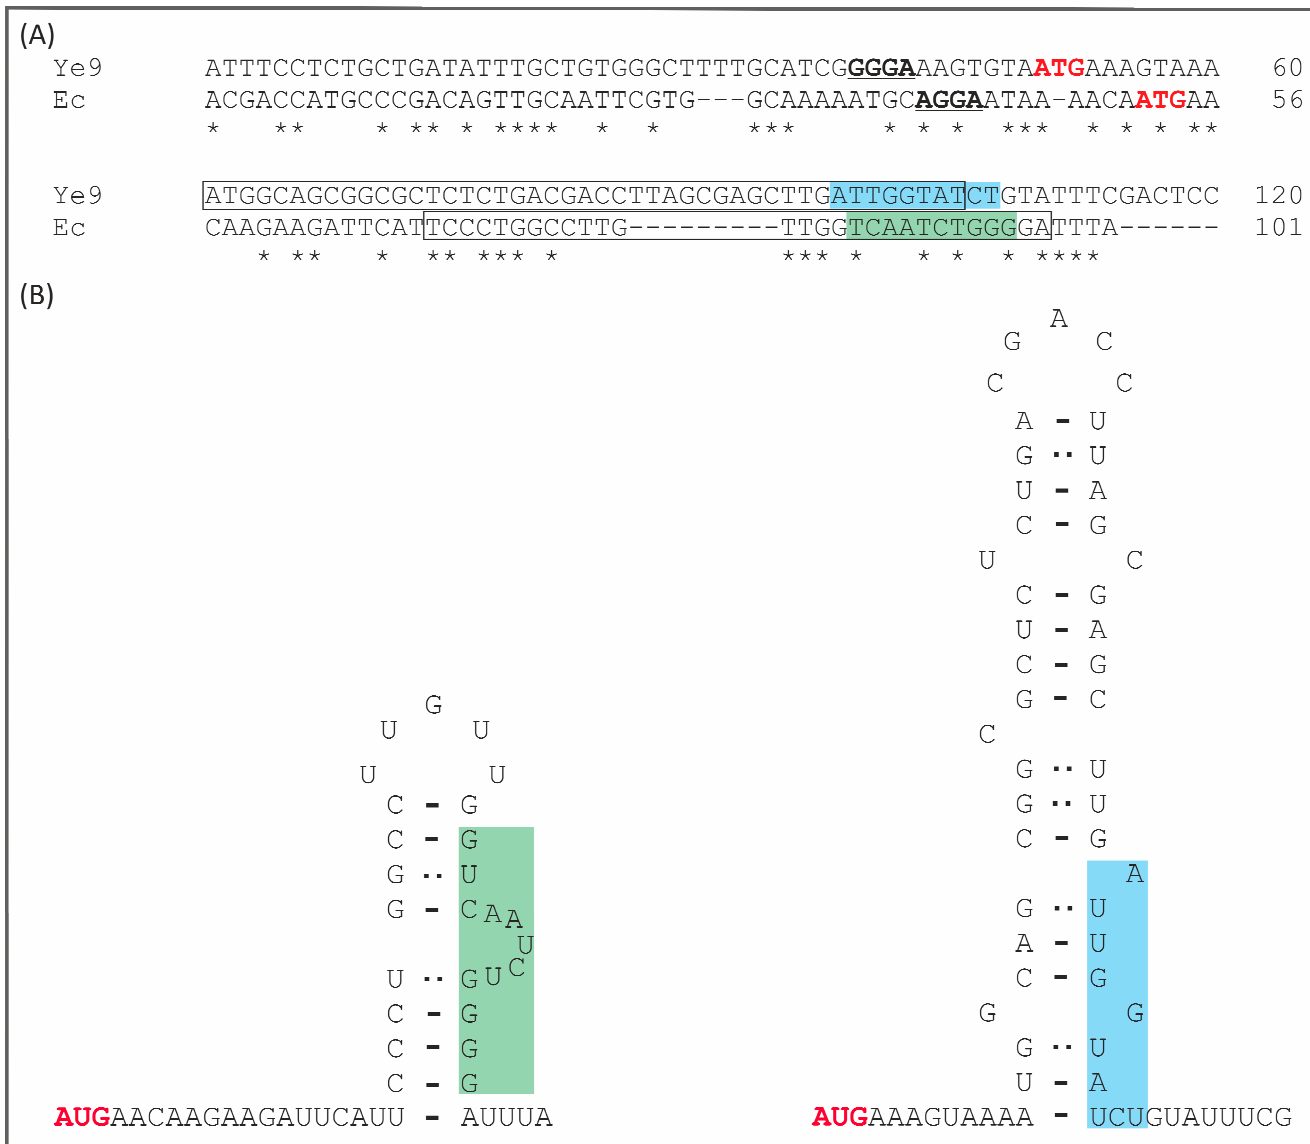

**Figure S2.** Predicted stem-loop like structures within *fepA* mRNAs and potential base-pairing with OmrA. (A) Sequence alignment of the 5' UTRs and start of the coding regions of *fepA* from *Y. enterocolitica* and *E. coli*. The stem-loop like structures are boxed. Sites of predicted base pairing between the *fepA* mRNA and OmrA are highlighted in green for *E. coli* and blue for *Y. enterocolitica*. Conserved nucleotides are indicated by asterisks. (B) Predicted stem-loop like structures of *fepA* mRNAs of *E. coli* (left) and *Y. enterocolitica* (right), and the regions potentially targeted by OmrA. The alignment was performed using Clustal Omega. Secondary structures and possible base-pairing were predicted using UNAFold (<http://www.unafold.org/mfold/applications/rna-folding-form.php>) and IntaRNA (<http://rna.informatik.uni-freiburg.de/IntaRNA>), respectively.



## REFERENCES

1. Brzostek, K.; Brzostkowska, M.; Bukowska, I.; Karwicka, E.; Raczkowska, A. OmpR negatively regulates expression of invasins in *Yersinia enterocolitica*. *Microbiology* **2007**, *153*, 2416–2425, doi:10.1099/mic.0.2006/003202-0.
2. Brzostek, K.; Raczkowska, A.; Zasada, A. The osmotic regulator OmpR is involved in the response of *Yersinia enterocolitica* O:9 to environmental stresses and survival within macrophages. *FEMS Microbiol. Lett.* **2003**, *228*, 265–271, doi:10.1016/S0378-1097(03)00779-1.
3. Jaworska, K.; Ludwiczak, M.; Murawska, E.; Raczkowska, A.; Brzostek, K. The regulator OmpR in *Yersinia enterocolitica* participates in iron homeostasis by modulating Fur level and affecting the expression of genes involved in iron uptake. *Int. J. Mol. Sci.* **2021**, *22*, 1475. doi: 10.3390/ijms22031475.
4. Sambrook, J.; Russel, D. *Molecular Cloning: A Laboratory Manual*; 3rd ed.; Cold Spring Harbor Laboratory Press.: Cold Spring Harbor, NY, 2001.
5. Simon, R.; Priefer, U.; Pühler, A. A Broad Host Range Mobilization System for *In Vivo* Genetic Engineering: Transposon Mutagenesis in Gram Negative Bacteria. *Bio/Technology* **1983**, *1*, 784–791, doi:10.1038/nbt1183-784.
6. Herrero, M.; de Lorenzo, V.; Timmis, K.N. Transposon vectors containing non-antibiotic resistance selection markers for cloning and stable chromosomal insertion of foreign genes in Gram-negative bacteria. *J. Bacteriol.* **1990**, *172*, 6557–6567.
7. Schmidtke, C.; Abendroth, U.; Brock, J.; Serrania, J.; Becker, A.; Bonas, U. Small RNA sX13: a multifaceted regulator of virulence in the plant pathogen *Xanthomonas*. *PLoS Pathog.* **2013**, *9*:e1003626. 10.1371/journal.ppat.1003626.
8. Kakoschke, T.K.; Kakoschke, S.C.; Zeuzem, C.; Bouabe, H.; Adler, K.; Heesemann, J.; Rossier, O. The RNA chaperone Hfq is essential for virulence and modulates the expression of four adhesins in *Yersinia enterocolitica*. *Sci. Rep.* **2016**, *8*, 6:29275. doi: 10.1038/srep29275.
9. Guillier, M.; Gottesman, S. Remodelling of the *Escherichia coli* outer membrane by two small regulatory RNAs. *Mol. Microbiol.* **2006**, *59*(1), 231–47. doi: 10.1111/j.1365-2958.2005.04929.x.
10. Figurski, D.H.; Helinski, D.R. Replication of an origin-containing derivative of plasmid RK2 dependent on a plasmid function provided in trans. *Proc. Natl. Acad. Sci. U. S. A.* **1979**, *76*, 1648–1652, doi:10.1073/pnas.76.4.1648.
11. Philippe, N.; Alcaraz, J.-P.; Coursange, E.; Geiselmann, J.; Schneider, D. Improvement of pCVD442, a suicide plasmid for gene allele exchange in bacteria. *Plasmid* **2004**, *51*, 246–255, doi:10.1016/j.plasmid.2004.02.003.
12. Miller, W.G.; Leveau, H.J.; Lindow, S.E. Improved *gfp* and *inaZ* Broad-Host-Range promoter-probe vectors. *MPMI* **2000**, *13*, 1243–1250.
13. Guzman, L.M.; Belin, D.; Carson, M.J.; Beckwith, J. Tight regulation, modulation, and high-level expression by vectors containing the arabinose PBAD promoter. *J. Bacteriol.* **1995**, *177*, 4121–4130, doi: 10.1128/jb.177.14.4121-4130.1995.
14. Nieckarz, M.; Raczkowska, A.; Debski, J.; Kistowski, M.; Dadlez, M.; Heesemann, J.; Rossier, O.; Brzostek, K. Impact of OmpR on the membrane proteome of *Yersinia enterocolitica* in different environments: repression of major adhesin YadA and heme receptor HemR. *Environ. Microbiol.* **2016**, *18*, 997–1021, doi:10.1111/1462-2920.13165.
